# Supplementary material for: Impact of Atmospheric Conditions and Source Identification of Gaseous Polycyclic Aromatic Hydrocarbons (PAHs) during a Smoke Haze Period in Upper Southeast Asia
Source: MDPI journal article supplement (doi:10.3390/toxics11120990), 2023-12-05
Supplement: s1 [file s1]

## Supplementary materials

**Table S1.** The recoveries of PAHs from the spiking method and SRM-1649 urban dust sample.

| Compound | % Recovery of sample treatment (Mean $\pm$ SD)   |                                                  |
|----------|--------------------------------------------------|--------------------------------------------------|
|          | Spiking method                                   | SRM 1649b                                        |
|          | Extraction procedure with SPE clean-up procedure | Extraction procedure with SPE clean-up procedure |
| NAP      | 81 $\pm$ 1                                       | 64 $\pm$ 2                                       |
| ACY      | 92 $\pm$ 3                                       | 98 $\pm$ 3                                       |
| ACE      | 93 $\pm$ 9                                       | 95 $\pm$ 5                                       |
| FLU      | 92 $\pm$ 5                                       | 98 $\pm$ 9                                       |
| PHE      | 89 $\pm$ 3                                       | 85 $\pm$ 3                                       |
| ANT      | 96 $\pm$ 2                                       | 92 $\pm$ 6                                       |
| FLU      | 94 $\pm$ 4                                       | 91 $\pm$ 5                                       |
| PYR      | 91 $\pm$ 1                                       | 84 $\pm$ 2                                       |

**Table S2.** Analytical characteristics of gaseous PAHs analyzed by GC–MS.

| Compound | Detection limit<br>( $\mu\text{g mL}^{-1}$ ) |       | Repeatability<br>(% RSD)  |                            | Reproducibility<br>(%RSD) |                            | Concentration<br>Linearity<br>( $\text{ng mL}^{-1}$ ) |
|----------|----------------------------------------------|-------|---------------------------|----------------------------|---------------------------|----------------------------|-------------------------------------------------------|
|          | LOD                                          | LOQ   | Low<br>range              | High<br>range              | Low<br>range              | High<br>range              |                                                       |
|          |                                              |       | ( $6\text{ ng mL}^{-1}$ ) | ( $60\text{ ng mL}^{-1}$ ) | ( $6\text{ ng mL}^{-1}$ ) | ( $60\text{ ng mL}^{-1}$ ) |                                                       |
| NAP      | 0.053                                        | 0.177 | 0.775                     | 0.560                      | 2.366                     | 3.678                      | 1-3,000                                               |
| ACY      | 0.039                                        | 0.129 | 0.589                     | 0.462                      | 0.901                     | 3.419                      | 1-3,000                                               |
| ACE      | 0.034                                        | 0.114 | 0.847                     | 0.669                      | 1.000                     | 3.371                      | 1-3,000                                               |
| FLU      | 0.040                                        | 0.132 | 0.571                     | 0.700                      | 1.006                     | 3.238                      | 1-3,000                                               |
| PHE      | 0.032                                        | 0.107 | 0.575                     | 0.703                      | 0.685                     | 3.366                      | 1-3,000                                               |
| ANT      | 0.040                                        | 0.132 | 0.944                     | 0.964                      | 0.904                     | 3.244                      | 1-3,000                                               |
| FLU      | 0.036                                        | 0.121 | 0.702                     | 2.574                      | 1.286                     | 3.249                      | 1-3,000                                               |
| PYR      | 0.038                                        | 0.126 | 1.477                     | 3.488                      | 5.003                     | 2.351                      | 1-3,000                                               |

**Table S3.** Method detection limit of developed gaseous PAHs sampling device based on biochar and XAD-2 as adsorbent.

| Compounds | Method detection limit (ng m <sup>-3</sup> ) |       |       |      |
|-----------|----------------------------------------------|-------|-------|------|
|           | Biochar                                      |       | XAD-2 |      |
|           | LOD                                          | LOQ   | LOD   | LOQ  |
| NAP       | 4.43                                         | 14.76 | 1.69  | 5.63 |
| ACY       | 0.26                                         | 0.86  | 0.29  | 0.96 |
| ACE       | 0.74                                         | 2.48  | 1.07  | 3.57 |
| FLU       | 0.38                                         | 1.28  | 0.44  | 1.46 |
| PHE       | 0.46                                         | 1.55  | 0.71  | 2.36 |
| ANT       | 1.06                                         | 3.54  | 0.79  | 2.62 |
| FLU       | 0.31                                         | 1.04  | 0.72  | 2.40 |
| PYR       | 0.49                                         | 1.62  | 0.97  | 3.23 |
